# Supplementary material for: Systematics of Phyllocnistis leaf-mining moths (Lepidoptera, Gracillariidae) feeding on dogwood (Cornus spp.) in Northeast Asia, with the description of three new species
Source: Zookeys. 2018 Feb 8;(736):79–118. doi: 10.3897/zookeys.736.20739 (PMC5906744; doi:10.3897/zookeys.736.20739)
Supplement: Supplementary material 1 — Table S1. Phyllocnistis species involved in the study. [file zookeys-736-079-s001.xls]

## Sheet: Лист1
Supplementary materials
ZooKeys
Systematics of Phyllocnistis leaf-mining moths (Lepidoptera: Gracillariidae) feeding on dogwood (Cornus spp.) in Northeast Asia, with the description of three new species
Natalia Kirichenko1,2, Paolo Triberti3, Shigeki Kobayashi4, Toshiya Hirowatari5, Camiel Doorenweerd6,7, Issei Ohshima8, Guo-Hua Huang9, Min Wang10, Emmanuelle Magnoux11, Carlos Lopez-Vaamonde11,12
1Sukachev Institute of Forest SB RAS, Akademgorodok 50/28, 660036, Krasnoyarsk, Russia; nkirichenko@yahoo.com
2Siberian Federal University, 79 Svobodny pr., 660041, Krasnoyarsk, Russia
3Museo Civico di Storia Naturale, Lungadige Porta Vittoria 9, I37129, Verona, Italy; caloptilia@alice.it
4Entomological Laboratory, Graduate School of Life and Environmental Science, Osaka Prefecture University, Sakai, Osaka, 599-8531, Japan; crossroad1994@hotmail.co.jp
5Entomological Laboratory, Faculty of Agriculture, Kyushu University, 6-10-1 Hakozaki, Fukuoka, 812-8581 Japan; hirowat_t@agr.kyushu-u.ac.jp
6Department of Plant and Environmental Protection Sciences, University of Hawaii, 3050 Maile Way, 96822, Honolulu, United States of America;
7Naturalis Biodiversity Center, PO Box 9557, NL-2300 RA Leiden, The Netherlands
8Department of Life and Environmental Sciences, Kyoto Prefectural University, Kyoto, Japan, issei@kpu.ac.jp
9Hunan Provincial Key Laboratory for Biology and Control of Plant Diseases and Insect Pests, Hunan Agricultural University, Changsha 410128, Hunan, China; ghhuang@hunau.edu.cn
10Department of Entomology, South China Agricultural University, Guangzhou 510642, Guangdong, China; minwang@scau.edu.cn
11INRA, UR0633 Zoologie Forestiere, F-45075 Orleans, France; emmanuelle.magnoux@inra.fr, carlos.lopez-vaamonde@inra.fr
12Institut de Recherche sur la Biologie de l'Insecte, CNRS UMR 7261, Universite Francois-Rabelais de Tours, UFR Sciences et Techniques, 37200 Tours, France
Corresponding author: Natalia Kirichenko (nkirichenko@yahoo.com)
Table S1. Phyllocnistis species involved in the study.
Where pertinent, genitalia preparation number and sex are given in square brackets in the Sample ID column. Both the Process ID and Sample ID codes link the voucher specimen to record and sequence data in BOLD database.
No.	Phyllocnistis species1	Insect stage2, genitalia slide number in [ ]	Sample ID	Process ID	BIN	Collector	Specimen depository3	Host plant	Country	Location	Date	Latitude (decimal degrees)	Longitude (decimal degrees)	Elevation	GenBank accession
															COI	H3	28S
1	P. cornella Ermolaev, 1987	Adult, ♀, [CDGP0275]	RMNH.5013759	WOGRA453-17	BOLD:ACU7120	C. Doorenweerd	RMNH	Cornus controversa Hemsl.	Japan	Hokkaido, Sorachi, Kamifurano	22.IX.2013	43.681	142.363	211	MG191409	MG191438	MG191391
2	P. cornella	Adult, ♀, [CDGP0136]	RMNH.5007963	WOGRA327-15	BOLD:ACU7120	C. Doorenweerd	RMNH	C. controversa	Japan	Hokkaido, Sorachi, Kamifurano	22.IX.2013	43.681	142.363	211	MG191430	MG191450	MG191403
3	P. indistincta sp.n.	Adult, ♂, holotype, [SK853]				S. Kobayashi	OPU	C. controversa	Japan	Honshu, Nara, Soni, Imai, Menashi	16.VI.2008	34.524	136.115	630
4	P. indistincta	Adult, paratype				M. Murase	OPU	C. controversa	Japan	Honshu, Tochigi, Nasu Imperial Villa	5.VIII.2006	37.105–37.120	140.00–140.01	980–1050
5	P. indistincta	Adult#1, paratype				M. Murase	OPU	C. controversa	Japan	Honshu, Tochigi, Nasu Imperial Villa	6.VIII.2006	37.105–37.120	140.00–140.01	980–1050
6	P. indistincta	Adult#2, paratype				M. Murase	OPU	C. controversa	Japan	Honshu, Tochigi, Nasu Imperial Villa	6.VIII.2006	37.105–37.120	140.00–140.01	980–1050
7	P. indistincta	Adult, paratype				M. Murase	OPU	C. controversa	Japan	Honshu, Tochigi, Nasu Imperial Villa	7.VIII.2006	37.105–37.120	140.00–140.01	980–1050
8	P. indistincta	Adult#1, paratype				M. Murase	OPU	C. controversa	Japan	Honshu, Tochigi, Nasu Imperial Villa	8.VIII.2006	37.105–37.120	140.00–140.01	980–1050
9	P. indistincta	Adult#2, paratype				M. Murase	OPU	C. controversa	Japan	Honshu, Tochigi, Nasu Imperial Villa	8.VIII.2006	37.105–37.120	140.00–140.01	980–1050
10	P. indistincta	Adult#3, paratype				M. Murase	OPU	C. controversa	Japan	Honshu, Tochigi, Nasu Imperial Villa	8.VIII.2006	37.105–37.120	140.00–140.01	980–1050
11	P. indistincta	Adult#4, paratype				M. Murase	OPU	C. controversa	Japan	Honshu, Tochigi, Nasu Imperial Villa	8.VIII.2006	37.105–37.120	140.00–140.01	980–1050
12	P. indistincta	Adult, paratype				K. Niimi	OPU	C. controversa	Japan	Honshu, Tochigi, Nasu Imperial Villa	1.X.2006	37.105–37.120	140.00–140.01	980–1050
13	P. indistincta	Adult, paratype				K. Niimi	OPU	C. controversa	Japan	Honshu, Tochigi, Nasu Imperial Villa	2.X.2006	37.105–37.120	140.00–140.01	980–1050
14	P. indistincta	Adult#1, paratype				K. Niimi	OPU	C. controversa	Japan	Honshu, Tochigi, Nasu Imperial Villa	3.X.2006	37.105–37.120	140.00–140.01	980–1050
15	P. indistincta	Adult#2, paratype				K. Niimi	OPU	C. controversa	Japan	Honshu, Tochigi, Nasu Imperial Villa	3.X.2006	37.105–37.120	140.00–140.01	980–1050
16	P. indistincta	Adult#1, paratype				K. Niimi	OPU	C. controversa	Japan	Honshu, Tochigi, Nasu Imperial Villa	5.X.2006	37.105–37.120	140.00–140.01	980–1050
17	P. indistincta	Adult#2, paratype				K. Niimi	OPU	C. controversa	Japan	Honshu, Tochigi, Nasu Imperial Villa	5.X.2006	37.105–37.120	140.00–140.01	980–1050
18	P. indistincta	Adult, paratype				K. Niimi	OPU	C. controversa	Japan	Honshu, Tochigi, Nasu Imperial Villa	6.X.2006	37.105–37.120	140.00–140.01	980–1050
19	P. indistincta	Adult, paratype				K. Niimi	OPU	C. controversa	Japan	Honshu, Tochigi, Nasu Imperial Villa	9.X.2006	37.105–37.120	140.00–140.01	980–1050
20	P. indistincta	Adult#1, paratype				K. Niimi	OPU	C. controversa	Japan	Honshu, Tochigi, Nasu Imperial Villa	10.X.2006	37.105–37.120	140.00–140.01	980–1050
21	P. indistincta	Adult#2, paratype				K. Niimi	OPU	C. controversa	Japan	Honshu, Tochigi, Nasu Imperial Villa	10.X.2006	37.105–37.120	140.00–140.01	980–1050
22	P. indistincta	Adult#3, paratype				K. Niimi	OPU	C. controversa	Japan	Honshu, Tochigi, Nasu Imperial Villa	10.X.2006	37.105–37.120	140.00–140.01	980–1050
23	P. indistincta	Adult#4, paratype				K. Niimi	OPU	C. controversa	Japan	Honshu, Tochigi, Nasu Imperial Villa	10.X.2006	37.105–37.120	140.00–140.01	980–1050
24	P. indistincta	Adult#5, paratype				K. Niimi	OPU	C. controversa	Japan	Honshu, Tochigi, Nasu Imperial Villa	10.X.2006	37.105–37.120	140.00–140.01	980–1050
25	P. indistincta	Adult#6, paratype				K. Niimi	OPU	C. controversa	Japan	Honshu, Tochigi, Nasu Imperial Villa	10.X.2006	37.105–37.120	140.00–140.01	980–1050
26	P. indistincta	Adult#7, paratype				K. Niimi	OPU	C. controversa	Japan	Honshu, Tochigi, Nasu Imperial Villa	10.X.2006	37.105–37.120	140.00–140.01	980–1050
27	P. indistincta	Adult#8, paratype				K. Niimi	OPU	C. controversa	Japan	Honshu, Tochigi, Nasu Imperial Villa	10.X.2006	37.105–37.120	140.00–140.01	980–1050
28	P. indistincta	Adult, paratype				K. Niimi	OPU	C. controversa	Japan	Honshu, Tochigi, Nasu Imperial Villa	6.VIII.2007	37.105–37.120	140.00–140.01	980–1050
29	P. indistincta	Adult#1, paratype				K. Niimi	OPU	C. controversa	Japan	Honshu, Tochigi, Nasu Imperial Villa	8.VIII.2007	37.105–37.120	140.00–140.01	980–1050
30	P. indistincta	Adult#2, paratype				K. Niimi	OPU	C. controversa	Japan	Honshu, Tochigi, Nasu Imperial Villa	8.VIII.2007	37.105–37.120	140.00–140.01	980–1050
31	P. indistincta	Adult #1, ♀, paratype	NK513	MICRU068-16	BOLD:ACY4130	S. Kobayashi	OPU	C. controversa	Japan	Honshu, Nagano, Okuyamada	02.VIII.2010	36.658–36.665	138.456–138.466	1100–1560	MG191414	MG191442	MG191395
32	P. indistincta	Adult #2, ♀, paratype	NK512	MICRU067-16	BOLD:ACY4130	S. Kobayashi	OPU	C. controversa	Japan	Honshu, Nagano, Okuyamada	02.VIII.2010	36.658–36.665	138.456–138.466	1100–1560	MG191418	MG191446	MG191399
33	P. indistincta	Adult#1, ♂, paratype, [TRB4220]				S. Kobayashi	OPU	C. controversa	Japan	Honshu, Nagano, Okuyamada	12-15.VIII.2010	36.658–36.665	138.456–138.466	1100–1560
34	P. indistincta	Adult#2, paratype				S. Kobayashi	OPU	C. controversa	Japan	Honshu, Nagano, Okuyamada	12.VIII.2010	36.658–36.665	138.456–138.466	1100–1560
35	P. indistincta	Adult, ♂, paratype, [SK323]				S. Kobayashi	OPU	C. controversa	Japan	Honshu, Nagano, Okuyamada	12–15.VIII.2010	36.658–36.665	138.456–138.466	1100–1560
36	P. indistincta	Adult#1, ♂, paratype				S. Kobayashi	OPU	C. controversa	Japan	Honshu, Nagano, Ohshirakawa	29.IX.2011	36.127	137.728	1040
37	P. indistincta	Adult#1, paratype				S. Kobayashi	OPU	C. controversa	Japan	Honshu, Nagano, Ohshirakawa	29.IX.2011	36.127	137.728	1040
38	P. indistincta	Adult#2, ♂, paratype				S. Kobayashi	OPU	C. controversa	Japan	Honshu, Nagano, Ohshirakawa	29.IX.2011	36.127	137.728	1040
39	P. indistincta	Adult#3, paratype				S. Kobayashi	OPU	C. controversa	Japan	Honshu, Nagano, Ohshirakawa	29.IX.2011	36.127	137.728	1040
40	P. indistincta	Adult#1, paratype				S. Yagi & T. Hirowatari	ELKU	C. controversa	Japan	Honshu, Nagano, Alps Park	24.X.2015	36.264	137.956	740
41	P. indistincta	Adult#2, paratype				S. Yagi & T. Hirowatari	ELKU	C. controversa	Japan	Honshu, Nagano, Alps Park	24.X.2015	36.264	137.956	740
42	P. indistincta	Adult#3, paratype				S. Yagi & T. Hirowatari	ELKU	C. controversa	Japan	Honshu, Nagano, Alps Park	24.X.2015	36.264	137.956	740
43	P. indistincta	Adult#4, paratype				S. Yagi & T. Hirowatari	ELKU	C. controversa	Japan	Honshu, Nagano, Alps Park	24.X.2015	36.264	137.956	740
44	P. indistincta	Adult, paratype				S. Kobayashi	OPU	C. controversa	Japan	Honshu, Yamanashi, Fuji-Kawaguchiko	11.VIII.2015	35.481	138.769	880
45	P. indistincta	Adult, paratype				S. Kobayashi & T. hirowatari	OPU	C. controversa	Japan	Honshu, Aichi, Shidara, Dando, Kirara	6.X.2008	35.120	137.481	920
46	P. indistincta	Adult, paratype				S. Kobayashi & T. hirowatari	OPU	C. controversa	Japan	Honshu, Osaka, Nose, Mt. Mikusa	30–31.V.2008	34.957	135.377	450
47	P. indistincta	Adult, paratype				S. Kobayashi & T. hirowatari	OPU	C. controversa	Japan	Honshu, Osaka, Nose, Mt. Mikusa	2.VI.2008	34.957	135.377	450
48	P. indistincta	Adult, ♀, paratype, [SK154]				S. Kobayashi & T. hirowatari	OPU	C. controversa	Japan	Honshu, Osaka, Nose, Mt. Mikusa	2.VI.2008	34.957	135.377	450
49	P. indistincta	Adult, paratype				S. Kobayashi & T. hirowatari	OPU	C. controversa	Japan	Honshu, Osaka, Nose, Mt. Mikusa	3.VI.2008	34.957	135.377	450
50	P. indistincta	Adult, ♀, paratype, [SK322]				S. Kobayashi & T. hirowatari	OPU	C. controversa	Japan	Honshu, Osaka, Nose, Mt. Mikusa	8.VI.2008	34.957	135.377	450
51	P. indistincta	Adult, ♀, paratype, [SK146]				S. Kobayashi	OPU	C. controversa	Japan	Honshu, Nara, Soni, Konagao	27.V.2008	34.509	136.120	438
52	P. indistincta	Adult, ♂, paratype, [SK163]				S. Kobayashi	OPU	C. controversa	Japan	Honshu, Nara, Soni, Konagao	11.VI.2008	34.509	136.120	438
53	P. indistincta	Adult, paratype				S. Kobayashi	OPU	C. controversa	Japan	Honshu, Nara, Soni, Konagao	13.VI.2008	34.509	136.120	438
54	P. indistincta	Adult,#1, paratype				S. Kobayashi	OPU	C. controversa	Japan	Honshu, Nara, Soni, Konagao	16.VI.2008	34.509	136.120	438
55	P. indistincta	Adult, ♀, paratype, [SK147]				S. Kobayashi	OPU	C. controversa	Japan	Honshu, Nara, Soni, Konagao	16.VI.2008	34.509	136.120	438
56	P. indistincta	Adult, #2, paratype				S. Kobayashi	OPU	C. controversa	Japan	Honshu, Nara, Soni, Konagao	16.VI.2008	34.509	136.120	438
57	P. indistincta	Adult, paratype				S. Kobayashi	OPU	C. controversa	Japan	Honshu, Nara, Soni, Konagao	17.VI.2008	34.509	136.120	438
58	P. indistincta	Adult, paratype				S. Kobayashi	OPU	C. controversa	Japan	Honshu, Nara, Soni, Konagao	23.X.2008	34.509	136.120	438
59	P. indistincta	Adult#1, paratype				S. Kobayashi	OPU	C. controversa	Japan	Honshu, Nara, Sonoi, Kumatawa	3.VI.2015	34.523	136.102	698
60	P. indistincta	Adult#2, paratype				S. Kobayashi	OPU	C. controversa	Japan	Honshu, Nara, Sonoi, Kumatawa	3.VI.2015	34.523	136.102	698
61	P. indistincta	Adult, ♀, paratype, [SK148]				S. Kobayashi	OPU	C. controversa	Japan	Honshu, Nara, Soni, Imai	15.VII.2008	34.524	136.115	630
62	P. indistincta	Adult, paratype				S. Kobayashi	OPU	C. controversa	Japan	Honshu, Nara, Soni, Imai	19–20.X.2008	34.524	136.115	630
63	P. indistincta	Adult, paratype				S. Kobayashi	OPU	C. controversa	Japan	Honshu, Nara, Soni, Imai	3.VI.2008	34.524	136.115	630
64	P. indistincta	Adult, ♂, paratype, [SK320]				S. Kobayashi	OPU	C. controversa	Japan	Honshu, Nara, Soni, Menashi	8.VI.2008	34.524	136.115	630
65	P. indistincta	Adult, paratype				S. Kobayashi	OPU	C. controversa	Japan	Honshu, Nara, Soni, Menashi	10.VI.2008	34.524	136.115	630
66	P. indistincta	Adult, #1, paratype				S. Kobayashi	OPU	C. controversa	Japan	Honshu, Nara, Soni, Menashi	16.VI.2008	34.524	136.115	630
67	P. indistincta	Adult, #2, paratype				S. Kobayashi	OPU	C. controversa	Japan	Honshu, Nara, Soni, Menashi	16.VI.2008	34.524	136.115	630
68	P. indistincta	Adult, ♀, paratype, [SK321]				S. Kobayashi	OPU	C. controversa	Japan	Honshu, Nara, Soni, Menashi	16.VI.2008	34.524	136.115	630
69	P. indistincta	Adult, paratype				S. Kobayashi	OPU	C. controversa	Japan	Honshu, Nara, Soni, Menashi	20.VI.2008	34.524	136.115	630
70	P. indistincta	Adult, paratype				S. Kobayashi	OPU	C. controversa	Japan	Honshu, Nara, Soni, Menashi	21–24.VI.2008	34.524	136.115	630
71	P. indistincta	Adult, paratype				S. Kobayashi	OPU	C. controversa	Japan	Honshu, Nara, Soni, Menashi	17.VII.2008	34.524	136.115	630
72	P. indistincta	Adult, paratype				S. Kobayashi	OPU	C. controversa	Japan	Honshu, Nara, Soni, Menashi	3.VII.2009	34.524	136.115	630
73	P. indistincta	Adult, #1, paratype				S. Kobayashi	OPU	C. controversa	Japan	Honshu, Nara, Soni, Menashi	4.VII.2009	34.524	136.115	630
74	P. indistincta	Adult, #2, paratype				S. Kobayashi	OPU	C. controversa	Japan	Honshu, Nara, Soni, Menashi	4.VII.2009	34.524	136.115	630
75	P. indistincta	Adult, #3, paratype				S. Kobayashi	OPU	C. controversa	Japan	Honshu, Nara, Soni, Menashi	4.VII.2009	34.524	136.115	630
76	P. indistincta	Adult, paratype				S. Kobayashi	OPU	C. controversa	Japan	Honshu,	27.VI.2017	34.523	136.115	630
77	P. indistincta	Larva	RMNH.INS.30395	WOGRA382-15	BOLD:ACY4130	E.J. van Nieukerken & S. Richter	RMNH	C. controversa	Japan	Honshu, Gifu, Takayama	06.X.2014	36.067	137.074	1115	MG191415	MG191443	MG191396
78	P. indistincta	Pupa # 1				S. Kobayashi	OPU	C. controversa	Japan	Honshu, Nara, Konagao	17.VI.2011	34.509	136.120	438
79	P. indistincta	Pupa # 2				S. Kobayashi	OPU	C. controversa	Japan	Honshu, Nagano, Ohshirakawa	29.IX.2011	36.127	137.728	1040
80	P. indistincta	Pupa #1				S. Kobayashi	OPU	C. controversa	Japan	Honshu, Nara, Soni, Imai, Menashi	19.VI.2017	34.524	136.115	630
81	P. indistincta	Pupa #2				S. Kobayashi	OPU	C. controversa	Japan	Honshu, Nara, Soni, Imai, Menashi	19.VI.2017	34.524	136.115	630
82	P. indistincta	Pupa #3				S. Kobayashi	OPU	C. controversa	Japan	Honshu, Nara, Soni, Imai, Menashi	19.VI.2017	34.524	136.115	630
83	P. indistincta	Pupa #2				S. Kobayashi	OPU	C. controversa	Japan	Honshu, Nara, Soni, Imai, Menashi	19.VI.2017	34.524	136.115	630
84	P. indistincta	Adult, #1, paratype				S. Kobayashi	OPU	C. florida L.	Japan	Honshu, Nara, Soni, Imai, Menashi	28.VII.2008	34.525	136.114	638
85	P. indistincta	Adult, #2, paratype				S. Kobayashi	OPU	C. florida	Japan	Honshu, Nara, Soni Imai, Menashi	28.VII.2008	34.525	136.114	638
86	P. indistincta	Adult, paratype				S. Kobayashi	OPU	C. florida	Japan	Honshu, Nara, Soni Imai, Menashi	1.VIII.2008	34.525	136.114	638
87	P. indistincta	Adult, ♀, paratype				S. Kobayashi	OPU	C. florida	Japan	Honshu, Nara, Soni Imai, Menashi	2.VIII.2008	34.525	136.114	638
88	P. indistincta	Adult, #1, paratype				S. Kobayashi	OPU	C. florida	Japan	Honshu, Nara, Soni Imai, Menashi	3.VIII.2008	34.525	136.114	638
89	P. indistincta	Adult, #2, paratype				S. Kobayashi	OPU	C. florida	Japan	Honshu, Nara, Soni Imai, Menashi	3.VIII.2008	34.525	136.114	638
90	P. indistincta	Adult, #3, paratype				S. Kobayashi	OPU	C. florida	Japan	Honshu, Nara, Soni Imai, Menashi	3.VIII.2008	34.525	136.114	638
91	P. indistincta	Adult, #4, paratype				S. Kobayashi	OPU	C. florida	Japan	Honshu, Nara, Soni Imai, Menashi	3.VIII.2008	34.525	136.114	638
92	P. indistincta	Adult, ♀, paratype				S. Kobayashi	OPU	C. florida	Japan	Honshu, Nara, Soni Imai, Menashi	2.VII.2009	34.525	136.114	638
93	P. indistincta	Adult, #1, paratype				S. Kobayashi	OPU	C. florida	Japan	Honshu, Nara, Soni Imai, Menashi	3.VII.2009	34.525	136.114	638
94	P. indistincta	Adult, #2, paratype				S. Kobayashi	OPU	C. florida	Japan	Honshu, Nara, Soni Imai, Menashi	3.VII.2009	34.525	136.114	638
95	P. indistincta	Adult, #3, paratype				S. Kobayashi	OPU	C. florida	Japan	Honshu, Nara, Soni Imai, Menashi	3.VII.2009	34.525	136.114	638
96	P. indistincta	Adult, paratype				S. Kobayashi	OPU	C. florida	Japan	Honshu, Nara, Soni Imai, Menashi	4.VII.2009	34.525	136.114	638
97	P. indistincta	Adult, #1, paratype				S. Kobayashi	OPU	C. florida	Japan	Honshu, Nara, Soni Imai, Menashi	5–6.VII.2009	34.525	136.114	638
98	P. indistincta	Adult, #2, paratype				S. Kobayashi	OPU	C. florida	Japan	Honshu, Nara, Soni Imai, Menashi	5–6.VII.2009	34.525	136.114	638
99	P. indistincta	Adult, #3, paratype				S. Kobayashi	OPU	C. florida	Japan	Honshu, Nara, Soni Imai, Menashi	5–6.VII.2009	34.525	136.114	638
100	P. indistincta	Adult, #4, paratype				S. Kobayashi	OPU	C. florida	Japan	Honshu, Nara, Soni Imai, Menashi	5–6.VII.2009	34.525	136.114	638
101	P. indistincta	Adult, #5, paratype				S. Kobayashi	OPU	C. florida	Japan	Honshu, Nara, Soni Imai, Menashi	5–6.VII.2009	34.525	136.114	638
102	P. indistincta	Adult, ♀, paratype				S. Kobayashi	OPU	C. florida	Japan	Honshu, Nara, Soni Imai, Menashi	5–6.VII.2009	34.525	136.114	638
103	P. indistincta	Adult, ♀, paratype				S. Kobayashi	OPU	C. florida	Japan	Honshu, Nara, Soni Imai, Menashi	5–6.VII.2009	34.525	136.114	638
104	P. indistincta	Adult, #1, paratype				S. Kobayashi	OPU	C. florida	Japan	Honshu, Nara, Soni Imai, Menashi	7.VII.2009	34.525	136.114	638
105	P. indistincta	Adult, #2, paratype				S. Kobayashi	OPU	C. florida	Japan	Honshu, Nara, Soni Imai, Menashi	7.VII.2009	34.525	136.114	638
106	P. indistincta	Adult, #3, paratype				S. Kobayashi	OPU	C. florida	Japan	Honshu, Nara, Soni Imai, Menashi	7.VII.2009	34.525	136.114	638
107	P. indistincta	Adult, #4, paratype				S. Kobayashi	OPU	C. florida	Japan	Honshu, Nara, Soni Imai, Menashi	7.VII.2009	34.525	136.114	638
108	P. indistincta	Adult, #1, paratype, [SK580]				S. Kobayashi	OPU	C. florida	Japan	Honshu, Nara, Soni Imai, Menashi	8.VII.2009	34.525	136.114	638
109	P. indistincta	Adult, #2, paratype				S. Kobayashi	OPU	C. florida	Japan	Honshu, Nara, Soni Imai, Menashi	8.VII.2009	34.525	136.114	638
110	P. indistincta	Adult, #3, paratype				S. Kobayashi	OPU	C. florida	Japan	Honshu, Nara, Soni Imai, Menashi	8.VII.2009	34.525	136.114	638
111	P. indistincta	Adult, #4, paratype				S. Kobayashi	OPU	C. florida	Japan	Honshu, Nara, Soni Imai, Menashi	8.VII.2009	34.525	136.114	638
112	P. indistincta	Adult, paratype				S. Kobayashi	OPU	C. florida	Japan	Honshu, Nara, Soni Imai, Menashi	24–25.VII.2010	34.525	136.114	638
113	P. indistincta	Adult, paratype				S. Kobayashi	OPU	C. florida	Japan	Honshu, Nara, Soni Imai, Menashi	30.VII.2010	34.526	136.114	638
114	P. indistincta	Adult#1, paratype				S. Kobayashi	OPU	C. florida	Japan	Honshu, Nara, Soni Imai, Menashi	27.VI.2017	34.518	136.126	455
115	P. indistincta	Adult#2, paratype				S. Kobayashi	OPU	C. florida	Japan	Honshu, Nara, Soni Imai, Menashi	27.VI.2017	34.518	136.126	455
116	P. indistincta	Adult, #1, paratype				S. Kobayashi & T. Hirowatari	OPU	C. kousa F.Buerger ex Hance	Japan	Honshu, Nagano, Nagawa, Ohyoriai	7.X.2008	36.035	137.694	1300
117	P. indistincta	Adult, #2, paratype				S. Kobayashi & T. Hirowatari	OPU	C. kousa	Japan	Honshu, Nagano, Nagawa, Ohyoriai	7.X.2008	36.035	137.694	1300
118	P. indistincta	Adult, #3, paratype				S. Kobayashi &	OPU	C. kousa	Japan	Honshu, Nagano, Nagawa, Ohyoriai	7.X.2008	36.035	137.694	1300
119	P. indistincta	Adult, paratype	NK514	MICRU069-16	BOLD:ACY4130	S. Kobayashi	OPU	C. kousa	Japan	Honshu, Nara, Nosegawa, Tateriko	19.VIII?.2008	34.158	135.658	1122	MG191416	MG191444	MG191397
120	P. indistincta	Adult, paratype				S. Kobayashi &	OPU	C. kousa	Japan	Honshu, Nara, Nosegawa, Tateriko	4–11.VIII.2008	34.158	135.658	1122
121	P. indistincta	Adult, #1, paratype				S. Kobayashi &	OPU	C. kousa	Japan	Honshu, Nara, Nosegawa, Tateriko	10–18.VIII.2008	34.158	135.658	1122
122	P. indistincta	Adult, #2, paratype				S. Kobayashi &	OPU	C. kousa	Japan	Honshu, Nara, Nosegawa, Tateriko	10–18.VIII.2008	34.158	135.658	1122
123	P. indistincta	Adult, #1, paratype				S. Kobayashi &	OPU	C. kousa	Japan	Honshu, Nara, Nosegawa, Tateriko	11.VIII.2008	34.158	135.658	1122
124	P. indistincta	Adult, #2, paratype				S. Kobayashi &	OPU	C. kousa	Japan	Honshu, Nara, Nosegawa, Tateriko	11.VIII.2008	34.158	135.658	1122
125	P. indistincta	Adult, #1, paratype				S. Kobayashi	OPU	C. kousa	Japan	Honshu, Nara, Kawakami	11.VIII.2011	34.331	135.950	628
126	P. indistincta	Adult, #2, paratype				S. Kobayashi	OPU	C. kousa	Japan	Honshu, Nara, Kawakami	11.VIII.2011	34.331	135.950	628
127	P. indistincta	Adult, ♀, paratype, [TRB4153]				S. Kobayashi	OPU	C. kousa	Japan	Honshu, Nara, Kawakami	12.VIII.2011	34.331	135.950	628
128	P. indistincta	Adult, ♀, paratype, [TRB4151]				S. Kobayashi	OPU	C. kousa	Japan	Honshu, Nara, Kawakami	12.VIII.2011	34.331	135.950	628
129	P. indistincta	Adult, #1, paratype				H. Kuroko	OPU	C. kousa	Japan	Honshu, Tottori, Mt. Daisen	9.VII.1965	35.358–35.386	133.523–133.556	700–1700
130	P. indistincta	Adult, #1, paratype				H. Kuroko	OPU	C. kousa	Japan	Honshu, Tottori, Mt. Daisen	9.VII.1965	35.358–35.386	133.523–133.556	700–1700
131	P. indistincta	Adult, #1, paratype				H. Kuroko	OPU	C. kousa	Japan	Honshu, Tottori, Mt. Daisen	9.VII.1965	35.358–35.386	133.523–133.556	700–1700
132	P. indistincta	Larva	NK515	MICRU070-16	BOLD:ACY4130	I. Ohshima	OPU	C. kousa	Japan	Kyushu, Fukuoka	01.VII.2016	33.483	130.905	639	MG191411	MG191440	MG191393
133	P. indistincta	Adult, rearing № IsO-777				I. Ohshima	OPU	C. kousa	Japan	Kyushu, Fukuoka	02.VII.2016	33.483	130.905	639
134	P. indistincta	Adult, paratype				N. Hirano	OPU	C. macrophylla Wall.	Japan	Honshu, Nagano, Matsumoto, Okada	4.X.2004	36.254–36.294	137.966–137.966	630–730
135	P. indistincta	Adult, paratype				N. Hirano	OPU	C. macrophylla	Japan	Honshu, Nagano, Matsumoto, Okada	18.X.2004	36.254–36.294	137.966–137.966	630–730
136	P. indistincta	Adult, paratype				N. Hirano	OPU	C. macrophylla	Japan	Honshu, Nagano, Anan, Tomikusa	30.VI.2006	36.254–36.294	137.966–137.966	630–730
137	P. indistincta	Adult, ♀, paratype [TRB4148]				S. Kobayashi	OPU	C. macrophylla	Japan	Honshu, Nara, Konagao, Tawamine	27.V.2008	34.510	136.116	476
138	P. indistincta	Adult, paratype				S. Kobayashi	OPU	C. macrophylla	Japan	Honshu, Nara, Konagao, Tawamine	20.VII.2011	34.516813	136.112865	685
139	P. indistincta	Adult, paratype				S. Kobayashi	OPU	C. macrophylla	Japan	Honshu, Nara, Soni, Konagao, Tawamine	25.VII.2011	34.516813	136.112865	685
140	P. indistincta	Adult, paratype				H. Kuroko	OPU	C. macrophylla	Japan	Honshu, Tottori, Mt. Daisen	12.VII.1965	35.358–35.386	133.523–133.556	700–1700
141	P. indistincta	Adult, paratype				S. Kobayashi	OPU	C. controversa Hemsl.	Japan	Shikoku, Tokushima, Naka, Fagus-no-mori	27.VIII.2010	33.904415,	134.232874	1300
142	P. indistincta	Adult, #1, paratype				H. Kuroko	OPU	C. controversa	Japan	Kyushu, Fukuoka, Hikosan	6.VII.1954	33.465–33.485	130.910–130.930	600–1200
143	P. indistincta	Adult, #2, paratype				H. Kuroko	OPU	C. controversa	Japan	Kyushu, Fukuoka, Hikosan	6.VII.1954	33.465–33.485	130.910–130.930	600–1200
144	P. indistincta	Adult, paratype				H. Kuroko	OPU	C. controversa	Japan	Kyushu, Fukuoka, Hikosan	7.VII.1954	33.465–33.485	130.910–130.930	600–1200
145	P. indistincta	Adult, #1, paratype				H. Kuroko	OPU	C. controversa	Japan	Kyushu, Fukuoka, Hikosan	9.VII.1954	33.465–33.485	130.910–130.930	600–1200
146	P. indistincta	Adult, #2, paratype				H. Kuroko	OPU	C. controversa	Japan	Kyushu, Fukuoka, Hikosan	9.VII.1954	33.465–33.485	130.910–130.930	600–1200
147	P. indistincta	Adult, paratype				H. Kuroko	OPU	C. controversa	Japan	Kyushu, Fukuoka, Hikosan	10.VII.1954	33.465–33.485	130.910–130.930	600–1200
148	P. indistincta	Adult, paratype				H. Kuroko	OPU	C. controversa	Japan	Kyushu, Fukuoka, Hikosan	15.VI.1955	33.465–33.485	130.910–130.930	600–1200
149	P. indistincta	Adult, paratype				H. Kuroko	OPU	C. controversa	Japan	Kyushu, Fukuoka, Hikosan	17.VI.1955	33.465–33.485	130.910–130.930	600–1200
150	P. indistincta	Adult, #1, paratype				H. Kuroko	OPU	C. controversa	Japan	Kyushu, Fukuoka, Hikosan	25.VI.1955	33.465–33.485	130.910–130.930	600–1200
151	P. indistincta	Adult, #2, paratype				H. Kuroko	OPU	C. controversa	Japan	Kyushu, Fukuoka, Hikosan	25.VI.1955	33.465–33.485	130.910–130.930	600–1200
152	P. indistincta	Adult, #3, paratype				H. Kuroko	OPU	C. controversa	Japan	Kyushu, Fukuoka, Hikosan	25.VI.1955	33.465–33.485	130.910–130.930	600–1200
153	P. indistincta	Adult, #1, paratype				H. Kuroko	OPU	C. controversa	Japan	Kyushu, Fukuoka, Hikosan	26.VI.1955	33.465–33.485	130.910–130.930	600–1200
154	P. indistincta	Adult, #2, paratype				H. Kuroko	OPU	C. controversa	Japan	Kyushu, Fukuoka, Hikosan	26.VI.1955	33.465–33.485	130.910–130.930	600–1200
155	P. indistincta	Adult, #1, paratype				H. Kuroko	OPU	C. controversa	Japan	Kyushu, Kagoshima, Kirishima Spa	6.X.1964	31.907	130.834	940
156	P. indistincta	Adult, #2, paratype				H. Kuroko	OPU	C. controversa	Japan	Kyushu, Kagoshima, Kirishima Spa	6.X.1964	31.907	130.834	940
157	P. indistincta	Adult #1, paratype				S. Yagi, T. Hirowatari, K. M. M. Kyaw & C. Tsuji	ELKU	C. macrophylla Wall.	Japan	Kyushu, Fukuoka, Kuwahara, Ito campus	31.v-8.vi.2017	33.5954	130.213	45
158	P. indistincta	Adult #2, paratype				S. Yagi, T. Hirowatari, K. M. M. Kyaw & C. Tsuji	ELKU	C. macrophylla	Japan	Kyushu, Fukuoka, Kuwahara, Ito campus	31.v-8.vi.2017	33.5954	130.213	45
159	P. indistincta	Adult #1, paratype				S. Yagi, T. Hirowatari, K. M. M. Kyaw & C. Tsuji	ELKU	C. macrophylla	Japan	Kyushu, Fukuoka, Kuwahara, Ito campus	9.vi.2017	33.5954	130.213	45
160	P. saepta sp.n.	Adult, ♂, holotype [IsO-793]				G.H. Huang & M Wang	HAU	C. macrophylla	China	Yunnan, Weixi	18.VII.2016	27.159	99.259	3347
161	P. saepta	Pupa, IsO-790-bis	NK517	MICRU072-16	BOLD:ADE5346	G.H. Huang & M Wang	HAU	C. macrophylla	China	Yunnan, Weixi	18.VII.2016	27.159	99.259	2800	MG191432	MG191452	MG191405
162	P. saepta	Larva, IsO-790	NK516	MICRU071-16	BOLD:ADE5346	G.H. Huang & M Wang	HAU	C. macrophylla	China	Yunnan, Weixi	18.VII.2016	27.159	99.259	2800	MG191423	MG191448	MG191401
163	P. verae sp. n.	Adult, ♂ holotype, N° 6-3, [TRB4200]				N. Kirichenko	SIF SB RAS	C. alba L.	Russia	Krasnoyarsk, sakala Berkut	28.VI6.2015	55.971	92.546	144
164	P. verae	Adult, ♀ paratype, [TRB4116]				N. Kirichenko	SIF SB RAS	C. alba	Russia	Krasnoyarsk, sakala Berkut	28.VI6.2015	55.971	92.546	144
165	P. verae	Adult, ♂ paratype, [TRB4199]				N. Kirichenko	SIF SB RAS	C. alba	Russia	Krasnoyarsk, sakala Berkut	28.VI.2015	55.971	92.546	144
166	P. verae	Adult, ♂ paratype, [TRB4152]				N. Kirichenko	SIF SB RAS	C. alba	Russia	Krasnoyarsk, sakala Berkut	28.VI.2015	55.971	92.546	144
167	P. verae	Adult, ♂ paratype, [TRB4225]				N. Kirichenko	SIF SB RAS	C. alba	Russia	Krasnoyarsk, sakala Berkut	28.VI.2015	55.971	92.546	144
168	P. verae	Adult, ♀ paratype [NK-39-15-4]				N. Kirichenko	SIF SB RAS	C. alba	Russia	Krasnoyarsk, sakala Berkut	28.VI.2015	55.971	92.546	144
169	P. verae	Larva #2	NK519	MICRU074-16	BOLD:ACX7754	N. Kirichenko	SIF SB RAS	C. alba	Russia	Krasnoyarsk, sakala Berkut	07.VII.2016	55.971	92.546	144	MG191417	MG191445	MG191398
170	P. verae	Larva #1	NK518	MICRU073-16	BOLD:ACX7754	N. Kirichenko	SIF SB RAS	C. alba	Russia	Krasnoyarsk, sakala Berkut	07.VII.2016	55.971	92.546	144	MG191413	MG191441	MG191394
171	P. verae	Larva #3	NK520	MICRU075-16	BOLD:ACX7754	N. Kirichenko	SIF SB RAS	C. alba	Russia	Krasnoyarsk, sakala Berkut	07.VII.2016	55.971	92.546	144	MG191428	MG191449	MG191402
172	P. verae	Larva #4	NK521	MICRU076-16	BOLD:ACX7754	N. Kirichenko	SIF SB RAS	C. alba	Russia	Krasnoyarsk, sakala Berkut	07.VII.2016	55.971	92.546	144	MG191431	MG191451	MG191404
173	P. verae	Larva #1, NK463	NK463	MICRU018-15	BOLD:ACX7754	N. Kirichenko	SIF SB RAS	C. alba	Russia	Krasnoyarsk, sakala Berkut	28.VI.2015	55.971	92.546	144	MG191421	MG191447	MG191400
174	P. verae	Larva #2				N. Kirichenko	SIF SB RAS	C. alba	Russia	Krasnoyarsk, sakala Berkut	28.VI.2015	55.971	92.546	144
175	P. verae	Larva #3				N. Kirichenko	SIF SB RAS	C. alba	Russia	Krasnoyarsk, sakala Berkut	28.VI.2015	55.971	92.546	144
176	P. verae	Larva #4				N. Kirichenko	SIF SB RAS	C. alba	Russia	Krasnoyarsk, sakala Berkut	05.VII.2015	55.971	92.546	144
177	P. verae	Larva #5				N. Kirichenko	SIF SB RAS	C. alba	Russia	Krasnoyarsk, sakala Berkut	05.VII.2015	55.971	92.546	144
178	P. verae	Larva #6				N. Kirichenko	SIF SB RAS	C. alba	Russia	Krasnoyarsk, sakala Berkut	05.VII.2015	55.971	92.546	144
179	P. verae	Larva #7				N. Kirichenko	SIF SB RAS	C. alba	Russia	Krasnoyarsk, sakala Berkut	05.VII.2015	55.971	92.546	144
180	P. citrella Stainton, 1856#	Adult	AYK_MJ_20	GREC059-12	BOLD:AAP5978	M. Jones			USA	Florida, Immokalee	30.IX.2011	26.474	-81.533	6	KF919103
181	P. citrella#	Adult	AYK_MJ_21	GREC060-12	BOLD:AAP5978	M. Jones			USA	Florida, Immokalee	30.IX.2011	26.474	-81.533	6	KF919114
182	P. citrella#	Adult	AYK_MJ_55	GREC062-12	BOLD:AAP5978	M. Jones			USA	Florida, Immokalee	30.IX.2011	26.474	-81.533	6	KF919115
183	P. citrella#	Adult	AYK_MJ_56	GREC063-12	BOLD:AAP5978	M. Jones			USA	Florida, Immokalee	30.IX.2011	26.474	-81.533	6	KF919115
184	P. citrella#	Adult	AYK_MJ_107	GREC072-12	BOLD:AAP5978	M. Jones			USA	Florida, Immokalee	30.IX.2011	26.474	-81.533	6	KF919087
185	P. citrella#	Adult	ALcitre1	LNOUC1142-11	BOLD:AAP5978	A. Lastuvka		Citrus lemon (L.) Osbeck	Portugal	Faro, Odelouca	30.VI.2010	37.219	-8.509	30	KX070814
186	P. citrella#	Adult	ALcitre2	LNOUC1143-11	BOLD:AAP5978	A. Lastuvka		C. lemon	Portugal	Faro, Odelouca	30.VI.2010	37.219	-8.509	30	KX071856
187	P. citrella#	Adult	RMNH.5013749	WOGRA452-17	BOLD:AAP5978	C. Doorenweerd	RMNH	Citrus x limonia Osbeck	United States	Hawaii	16.IV.2016	19.729	-155.089	13	MG191422
188	P. extrematrixMartynova, 1955#	Adult	LAC5extr	GRPAL1353-13	BOLD:AAU3997	A. Lastuvka		Populus x canadensis Moench	Czech Rep.	Olomouc, Celechovice	30.VIII.2012	49.510	17.369	240	MG191407
189	P. extrematri#	Adult	LAC7extr	GRPAL1355-13	BOLD:AAU3997	A. Lastuvka		Populus x canadensis	Slovakia	Kuty	30.IX.2012	48.658	17.022	150	MG191435
190	P. extrematri#	Adult	LAC11nex	GRPAL1359-13	BOLD:AAU3997	A. Lastuvka			Spain	Cuenca, La Toba	24.VI.2012	40.041	-1.646	1070	MG191412
191	P. extrematri#	Adult	LH4spAra	GRPAL875-12	BOLD:AAU3997	A. Lastuvka			Spain	Aragon, Teruel	28.VI.2011	40.338	-1.615	1500	KX046145
192	P. extrematri#	Adult	CLV2476	GRPAL413-11	BOLD:AAU3997	A. Cama			France	Indre et Loire, Huismes	03.V.1998	47.232	0.252	80	KX044792
193	P. extrematri#	Adult	TLMF Lep 03555	PHLAD380-11	BOLD:AAU3997	J. Nel			France	Provence-Alpes-Cote d'Azur, Barcelonnette	05.VII.2005	44.392	6.640	1150	KX042455
194	P. gracilistylellaKobayashi, Jinbo & Hirowatari, 2011*	Adult	AB614510	GBGL7451-11	BOLD:AAZ7894	S. Kobayashi	OPU	Salix gracilistyla Miq.	Japan	Nara, Soni, Imai	15.X.2009	34.509	136.123	415	AB614510
195	P. gracilistylella*	Adult	AB614508	GBGL7453-11	BOLD:AAZ7894	S. Kobayashi	OPU	S. gilgiana Seemen.	Japan	Mie, Nabari, Natsumi	10.XI.2009	34.619	136.101	195	AB614508
196	P. gracilistylella*	Adult	AB614506	GBGL7455-11	BOLD:AAZ7894	S. Kobayashi	OPU	S. integra Thunb.	Japan	Nagano, Matsumoto, Azusa-River	1.X.2008	36.217	137.870	640	AB614506
197	P. gracilistylella*	Adult	AB614504	GBGL7457-11	BOLD:AAZ7894	S. Kobayashi	OPU	S. gilgiana	Japan	Nagano, Nagano, Sai-gawa	11.IX.2009	36.618	138.213	345	AB614504
198	P. labyrinthella (Bjerkander, 1790)#	Adult	CLV5934	GRAAM025-13	BOLD:ACX5473	G. Deschka		Populus tremula L.	Italy	Trentino-Alto Adige, Eselweg	30.VI.1998	46.911	11.948	1200	MG191437
199	P. labyrinthella	Larva	NK97	GRAS007-13	BOLD:ACX5473	N. Kirichenko	SIF SB RAS	P. tremula	Russia	Kemerovo, Kuzedeevo	24.VI.2013	53.339	87.206	260	MG191408
200	P. labyrinthella	Larva	NK63	GRPAL1107-13	BOLD:ACX5473	N. Kirichenko	SIF SB RAS	P. tremula	Russia	Novosibirsk, CSBG	14.VI.2012	54.820	83.104	155	MG191406
201	P. labyrinthella	Larva	NK64	GRPAL1108-13	BOLD:ACX5473	N. Kirichenko	SIF SB RAS	P. tremula	Russia	Novosibirsk, CSBG	13.VI.2012	54.820	83.104	155	MG191426
202	P. labyrinthella	Larva	NK585	SIBLE074-17	BOLD:ACX5473	N. Kirichenko	SIF SB RAS	P. alba L.	Russia	Khakassia Republic, Abakan	12.VI.2016	53.729	91.476	242	MF409943
203	P. labyrinthella	Larva	NK586	SIBLE075-17	BOLD:ACX5473	N. Kirichenko	SIF SB RAS	P. tremula	Russia	Khakassia Republic, Abakan	12.VI.2016	53.729	91.476	242	MG191410
204	P. labyrinthella#	Adult	LAD3laby	GRPAL1363-13	BOLD:ACX5473	A. Lastuvka		P. tremula	Czech Rep.	Brno, Subirov	30.IX.2012	49.603	16.813	590	MG191420
205	P. labyrinthella#	Adult	RMNH.5007969	WOGRA324-15	BOLD:ACX5473	C. Doorenweerd & W. Moerland	RMNH		Netherlands	South Holland, Wassenaar, Meijendel	08.X.2013	52.157	4.379	12	MG191419
206	P. labyrinthella#	Larva	RMNH.INS.30589	WOGRA384-15	BOLD:ACX5473	P. van Wielink	RMNH	Salix pentandra L.	Norway	Ostlandet, Buskerud,Noresund	04.VII.2015	60.18	9.623	163	MG191434
207	P. labyrinthella#	Larva	RMNH.INS.30590	WOGRA385-15	BOLD:ACX5473	P. van Wielink	RMNH	S. pentandra	Norway	Ostlandet, Buskerud,Noresund	04.VII.2015	60.18	9.623	163	MG191433
208	P. unipunctella (Stephens, 1834)	Larva	NK485	MICRU040-15	BOLD:ACI4050	N. Kirichenko	SIF SB RAS	Populus balsamifera L.	Russia	Buryatiya Republic, Ulan-Ude	10.VIII.2015	51.839	107.578	526	MG191424
209	Phyllocnistis sp.1	Larva	NK595	SIBLE084-17	BOLD:ADF2906	N. Kirichenko	SIF SB RAS	Salix sp.	Russia	Primorye, Gornotaejnoe, MTS	23.VII.2016	43.681	132.165	224	MG191427
210	Phyllocnistis sp.2#	Adult	RMNH.INS.30389	WOGRA381-15	BOLD:ACY3695	E.J. van Nieukerken	RMNH	Parthenocissus tricuspidata (Siebold & Zucc.) Planch.	Japan	Honshu. Kyoto, Ashu	02.X.2014	35.310	135.715	370	MG191429
211	Phyllocnistis sp.3#	Adult	AK0189	GRANO189-11	BOLD:AAW1087	A. Kawakita		Derris trifoliata Lour.	Japan	Okinawa, Iriomote Is., Komi	09.IX.2008	24.359	123.891	452	GRANO189-11
212	Phyllocnistis sp.4#	Adult	AK0273	LNOUD2365-12	BOLD:ABV1054	A. Kawakita		Ligustrum japonicum Thunb.	Japan	Shikoku-chiho, Kochi, Muroto-misaki	27.VI.2010	33.268	134.166	68	MG191425
213	Outgroup: Phyllocnistis labyrinthella (H3 and 28S trees)	Larva	NK586	SIBLE075-17	BOLD:ACX5473	N. Kirichenko	SIF SB RAS	Populus tremula	Russia	Khakassia Republic, Abakan	12.VI.2016	53.729	91.476	242		MG191439	MG191392
214	Outgroup: Phyllonorycter connexella (Zeller, 1846) (COI tree)	Larva	NK554	SIBLE043-17	BOLD:AAD9951	N. Kirichenko	SIF SB RAS	Salix sp.	Russia	Republic of Khakassia, Abakan	11.VI.2016	53.729	91.476	242	MF409944
1 # – barcodes were borrowed from BOLD, * borrowed from GenBank.
2All adults of Cornus-feeding Phyllocnistis spp. listed in the paper were obtained by rearing larvae or pupae in the laboratory.
3Specimen depositories: ELKU – Entomological Laboratory, Kyushu University, Fukuoka, Japan; HAU – Hunan Agricultural University, Hunan, China; OPU – Osaka Prefecture University, Osaka, Japan; RMNH – Naturalis Biodiversity Center, Leiden, The Netherlands; SIF SB RAS – Sukachev Institute of Forest, Siberian Branch of the Russian Academy of Sciences, Krasnoyarsk, Russia.
Empy cells – no data.
